# Supplementary material
Source: PubMed Central journal article supplement (PMC7611593)
Supplement: EMS131972-supplement-Fig_1F_original_blots.pdf [file EMS131972-supplement-Fig_1F_original_blots.pdf]

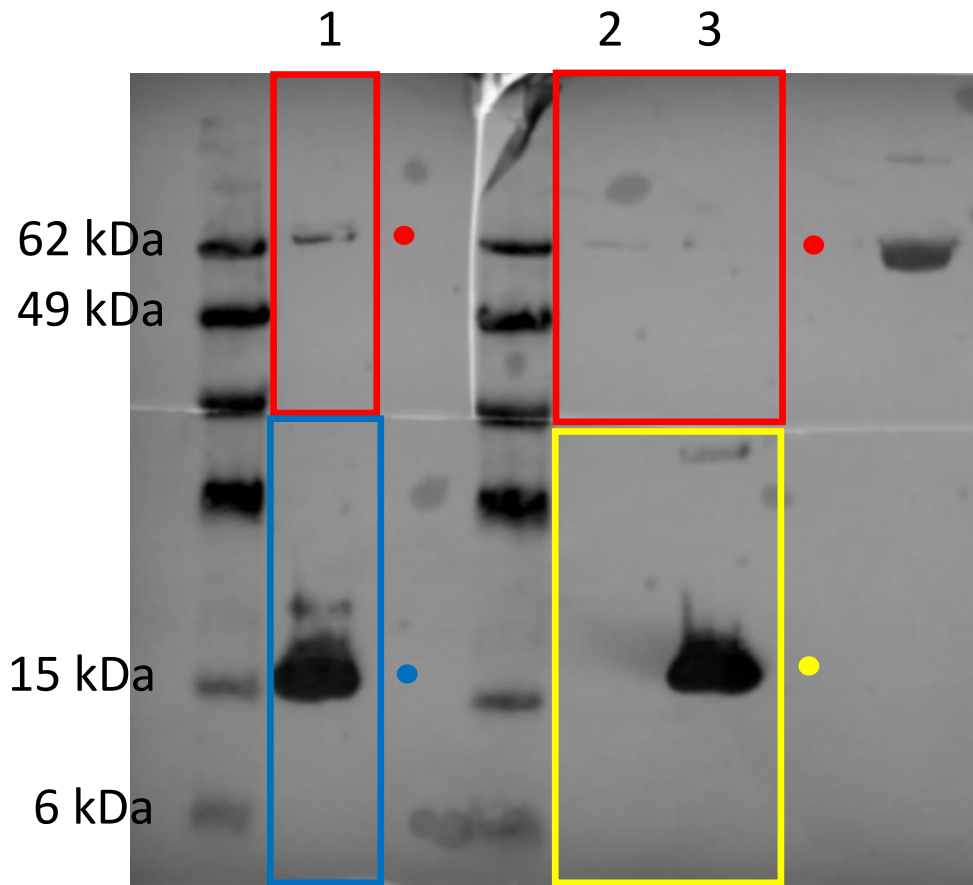

Boxed in red are the areas of the blot used to detect Tse8-Strep (red circles) for lanes 1, 2 and 3 shown in Fig. 1f

Boxed in blue is the area of the blot used to detect Tsi8-His (blue circle) for lane 1 of Fig. 1f.

Boxed in yellow is the area of the blot used to detect CcmE-His (yellow circle) for lanes 2 and 3 of Fig. 1f.
