# Supplementary material
Source: PubMed Central journal article supplement (PMC7611593)
Supplement: EMS131972-supplement-Fig_2B_original_blots.pdf [file EMS131972-supplement-Fig_2B_original_blots.pdf]

pMMB67 (control) pMMB67:*vgrG1a*-V5

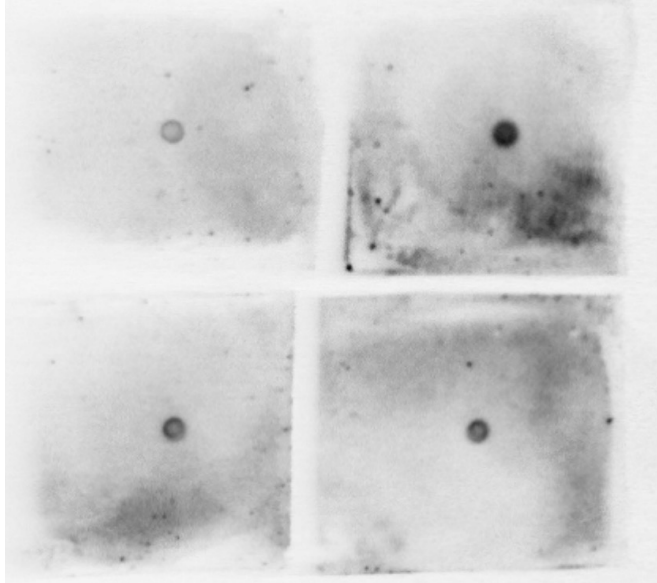

pE221:*ccmE*-His

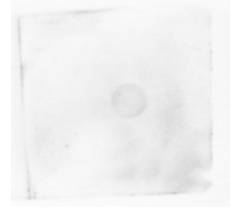

**Replicate 1**

(Tse8 spotted on membrane)

pMMB67:*vgrG1b*-V5 pMMB67:*vgrG1c*-V5

pMMB67 (control) pMMB67:*vgrG1a*-V5

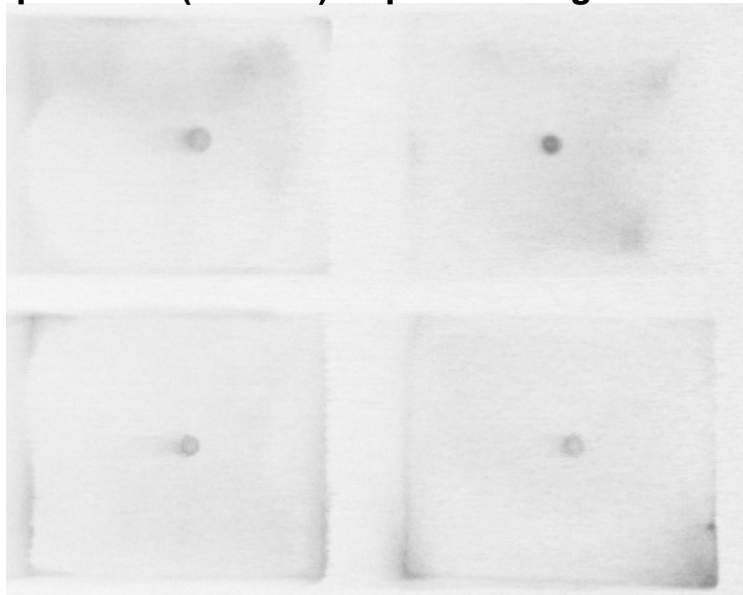

pE221:*ccmE*-His

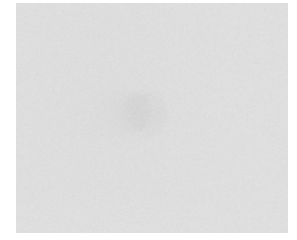

**Replicate 2**

(Tse8 spotted on membrane)

pMMB67:*vgrG1b*-V5 pMMB67:*vgrG1c*-V5

pMMB67 (control) pMMB67:*vgrG1a*-V5

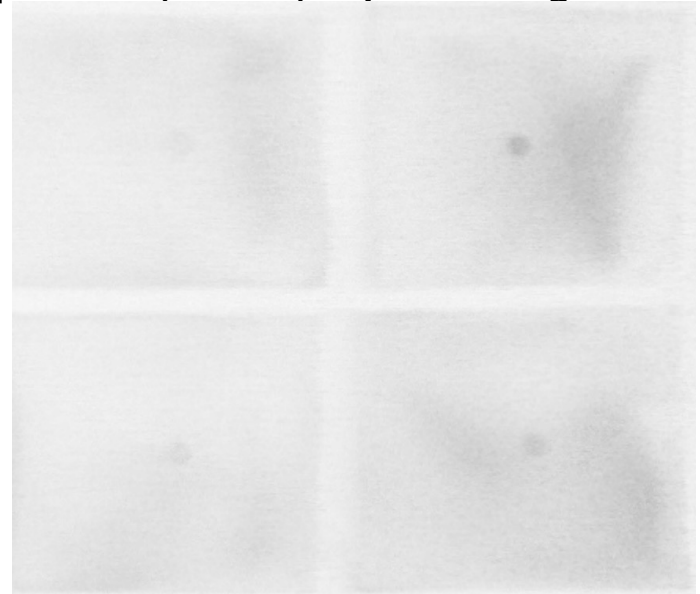

pE221:*ccmE*-His

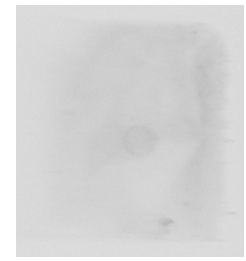

**Replicate 3**

(Tse8 spotted on membrane)

pMMB67:*vgrG1b*-V5 pMMB67:*vgrG1c*-V5
