# Supplementary material
Source: PubMed Central journal article supplement (PMC7611593)
Supplement: EMS131972-supplement-Fig_3C_original_blots.pdf [file EMS131972-supplement-Fig_3C_original_blots.pdf]

### **FIGURE 3C**

#### **Replicate 1**

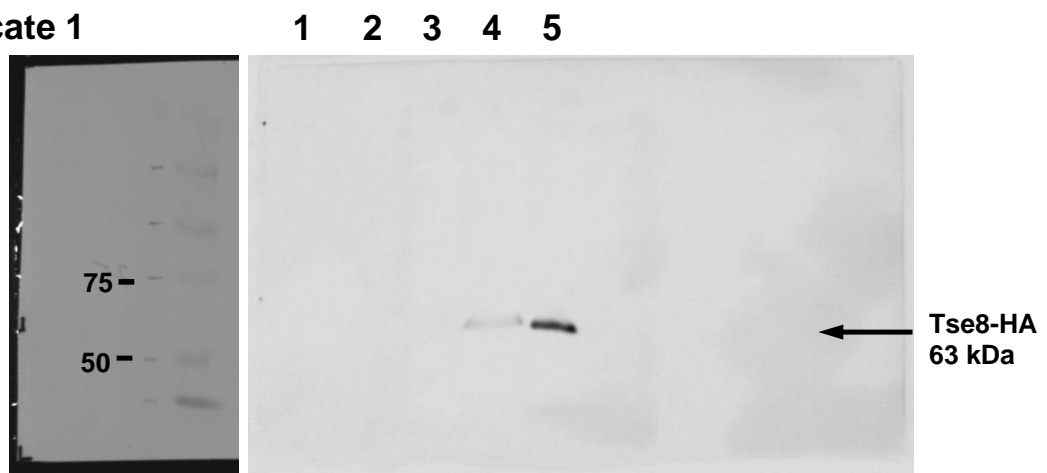

**Lane 1:** Molecular weight marker (Shown in the left image in brightfield); **Lane 2:** Empty Vector (-); **Lane 3:** Empty Vector (+); **Lane 4:** Tse8 (-); **Lane 5:** Tse8 (+); **Remaining lanes:** No samples

#### **Replicate 2**

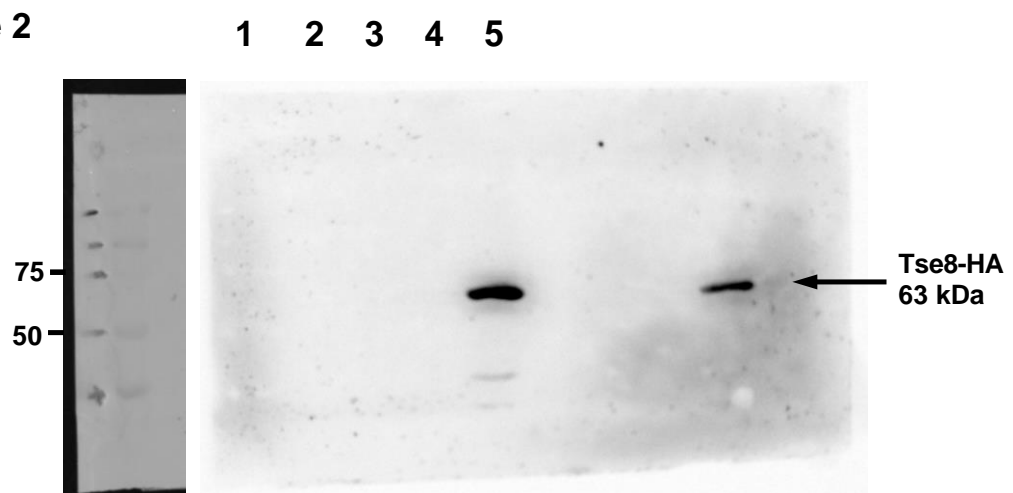

Lane 1-5 as in replicate 1. Remaining lanes: samples for a different experiment

#### **Replicate 3**

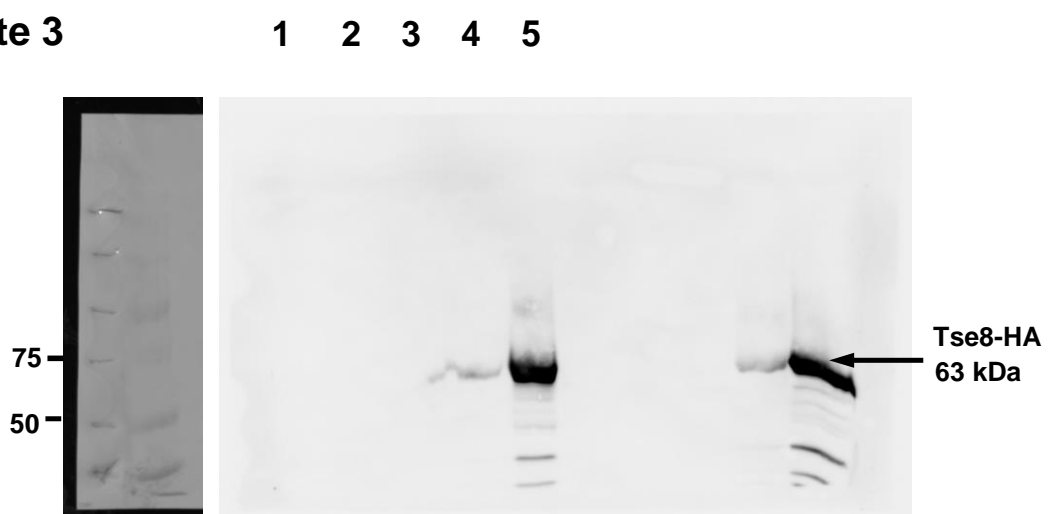

**FIGURE 3D**

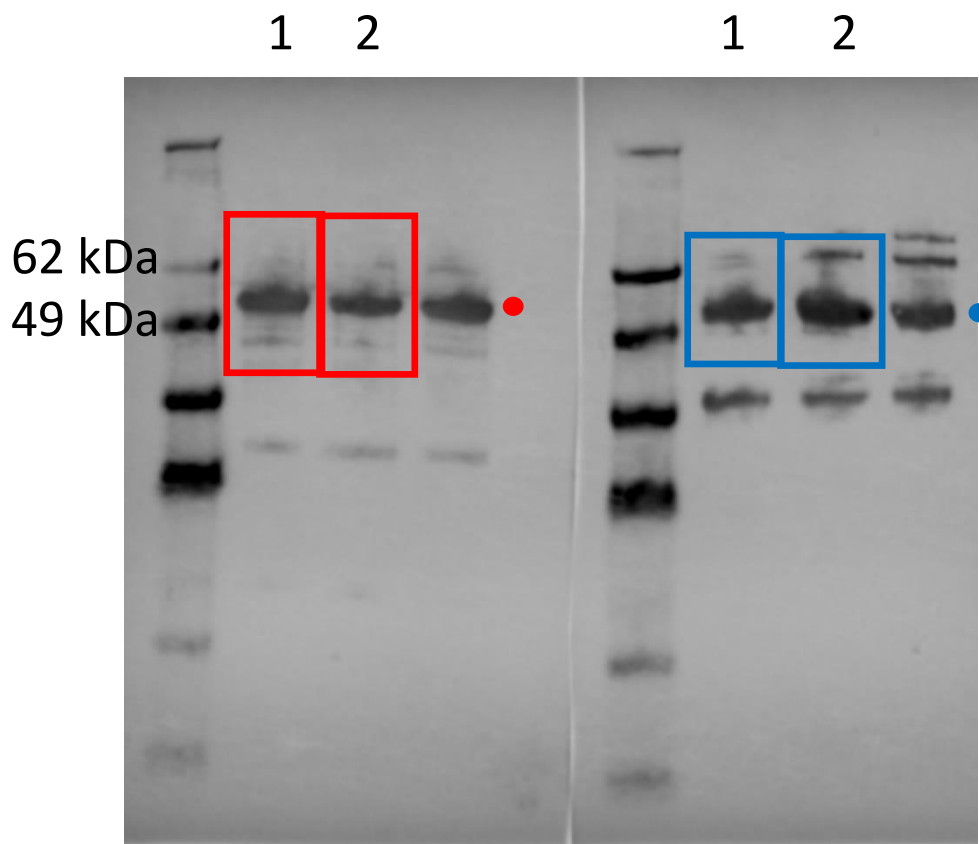

Boxed in red is the area of the blot used to detect GatA-V5 (red circle) for lanes 1 and 2 of the left panel of Fig. 3d.

Boxed in blue is the area of the blot used to detect GatB-His (blue circle) for lanes 1 and 2 of the left panel of Fig. 3d.

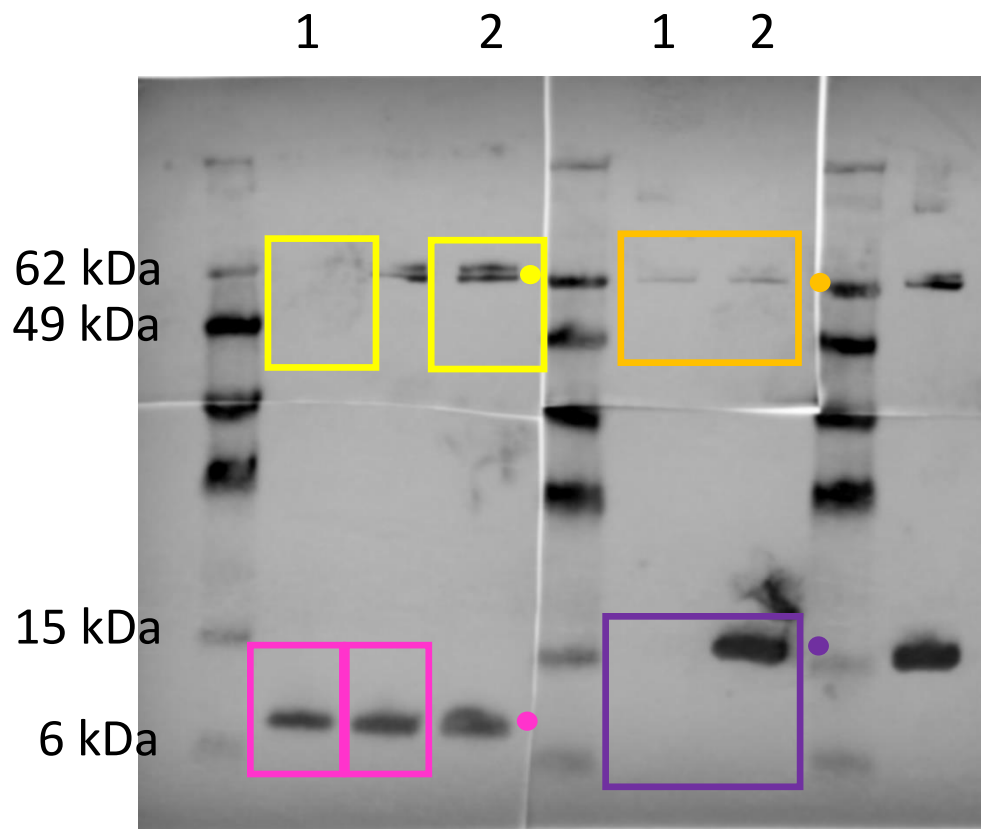

Boxed in yellow are the areas of the blot used to detect Tse8-Strep (yellow circle) for lanes 1 and 2 of the left panel of Fig. 3d.

Boxed in orange are the areas of the blot used to detect Tse8-Strep (orange circle) for lanes 1 and 2 of the right panel of Fig. 3d.

Boxed in pink are the areas of the blot used to detect GatC-HA (pink circle) for lanes 1 and 2 of the left panel of Fig. 3d.

Boxed in purple are the areas of the blot used to detect CcmE-His (purple circle) for lanes 1 and 2 of the right panel of Fig. 3d.

# FIGURE 3E

Left panel - Replicate 1

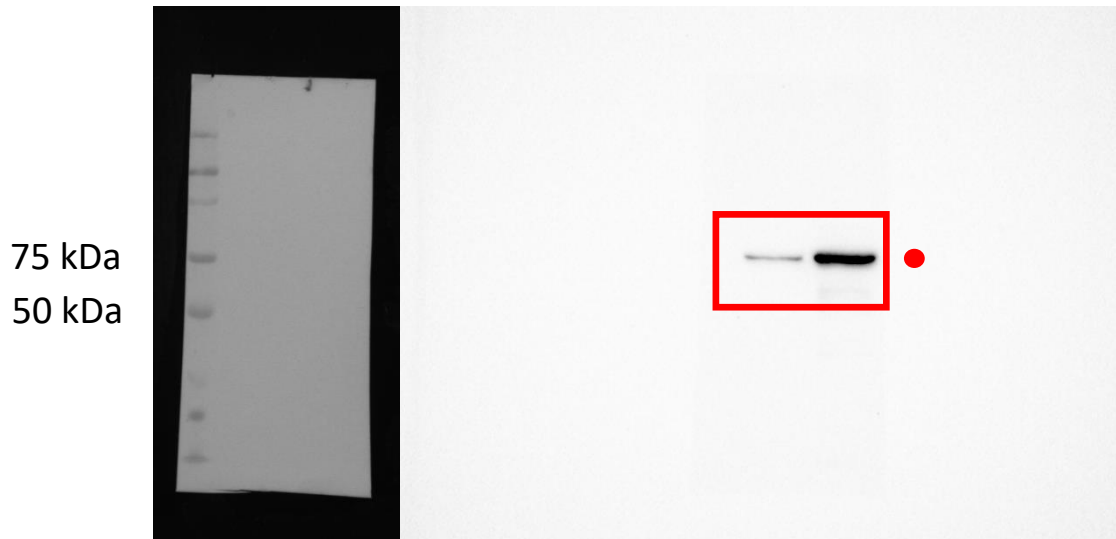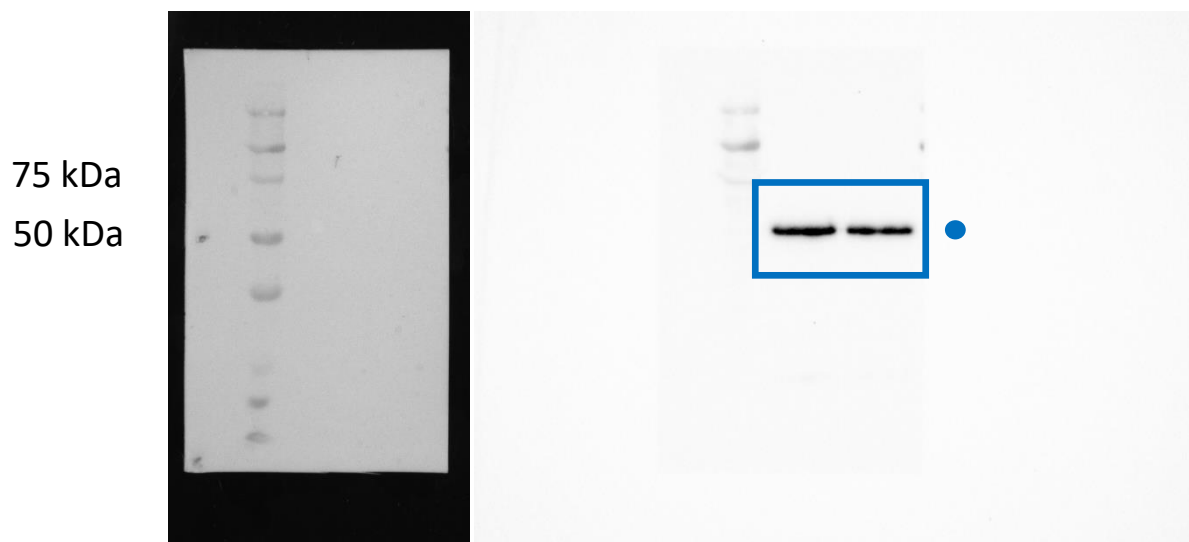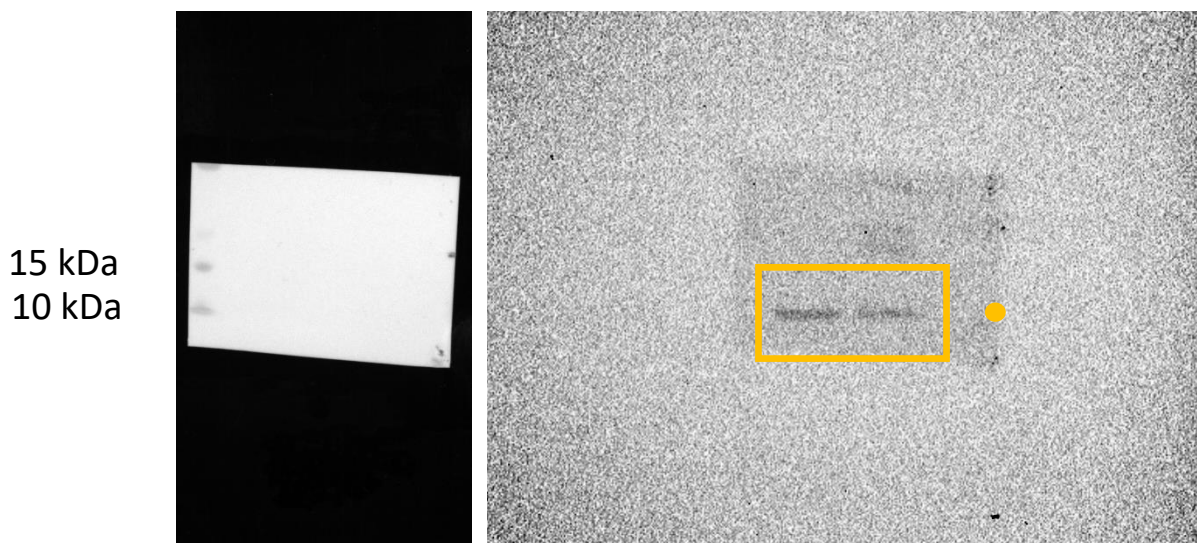

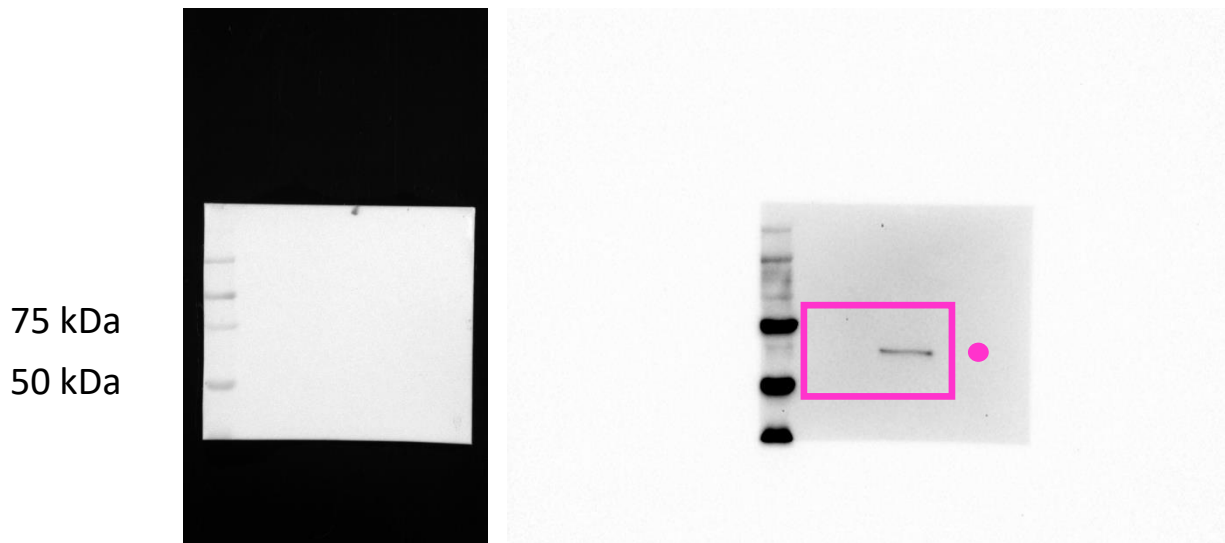

Boxed in red is the area of the blot used to detect GatA-V5 (red circle) for lanes 1 and 2 of the left panel of Fig. 3e.

Boxed in blue is the area of the blot used to detect GatB-His (blue circle) for lanes 1 and 2 of the left panel of Fig. 3e.

Boxed in orange is the area of the blot used to detect GatC-HA (orange circle) for lanes 1 and 2 of the left panel of Fig. 3e.

Boxed in pink is the area of the blot used to detect Tse8-Strep (pink circle) for lanes 1 and 2 of the left panel of Fig. 3e.

On the left are the molecular weight markers shown in brightfield.

### Left panel - Replicates 2 and 3

As above - the other two replicates of the same blots are shown. The relevant bands are indicated using the same color code.

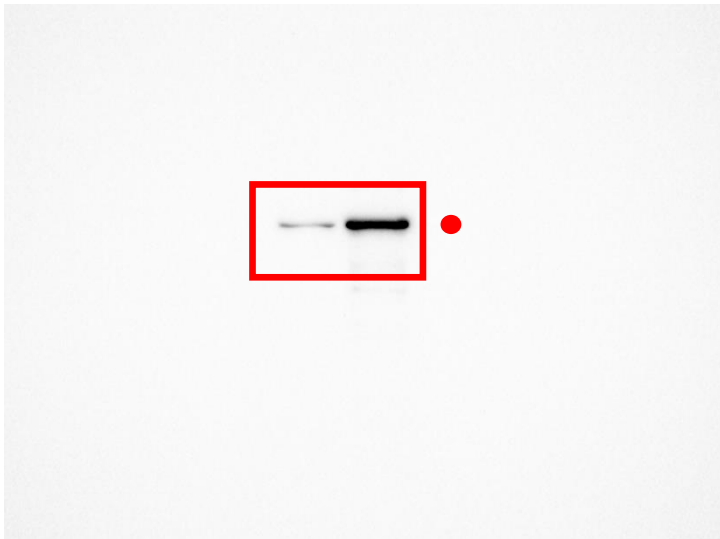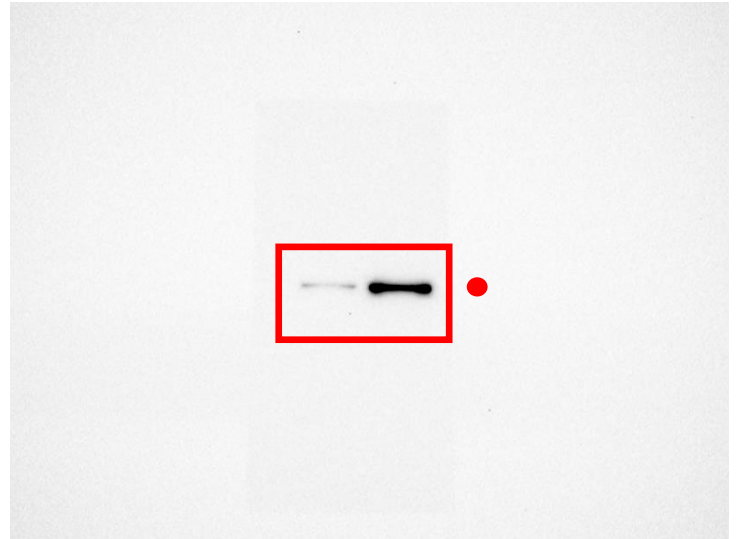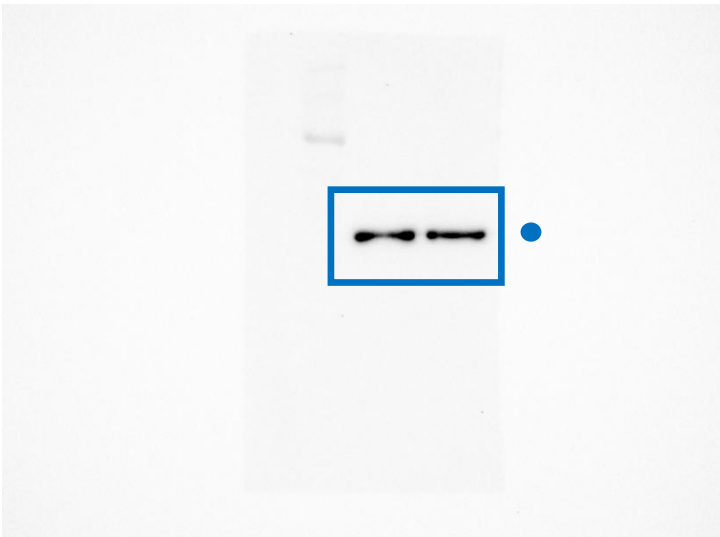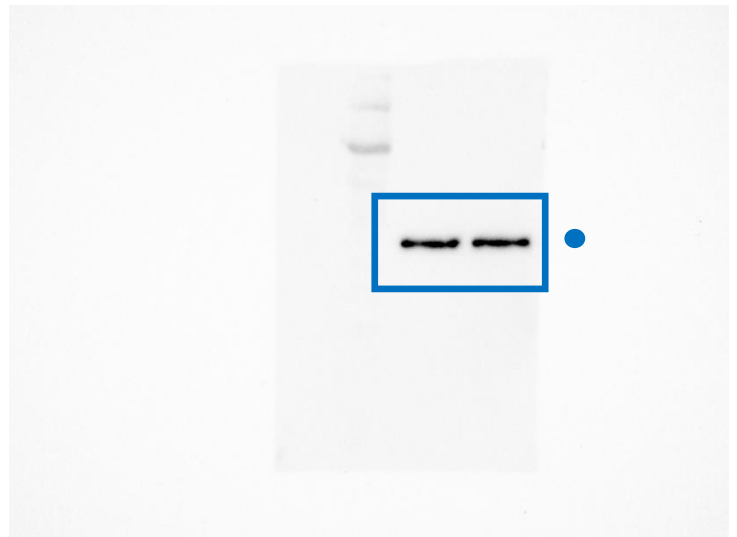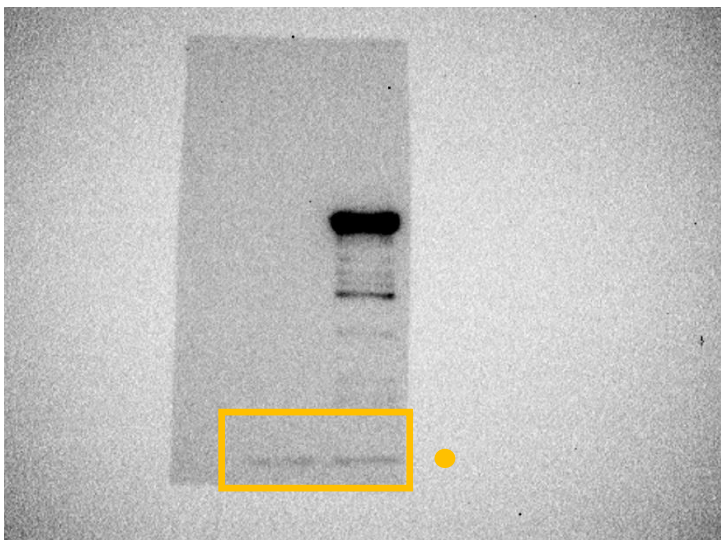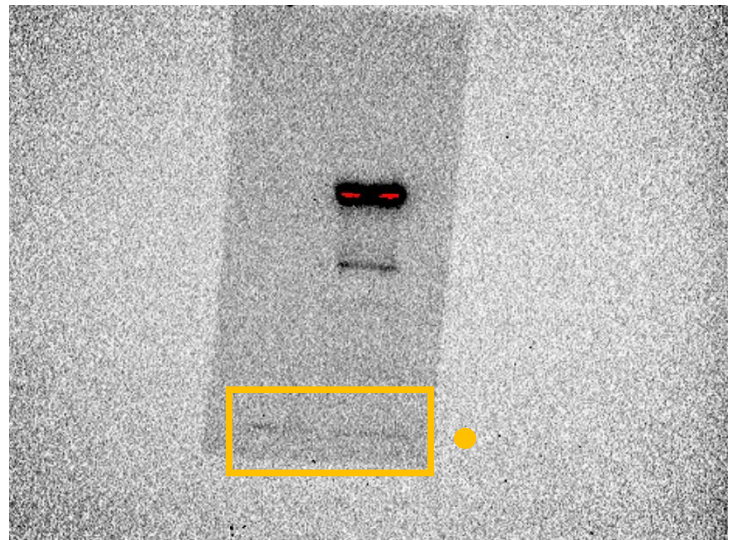

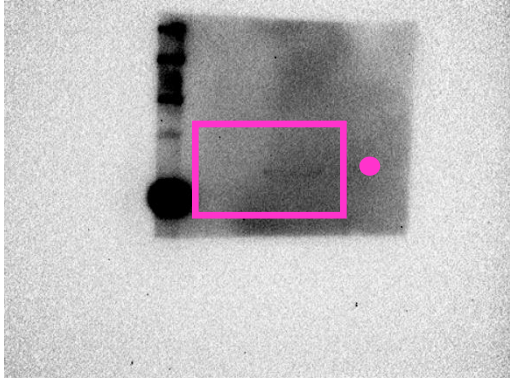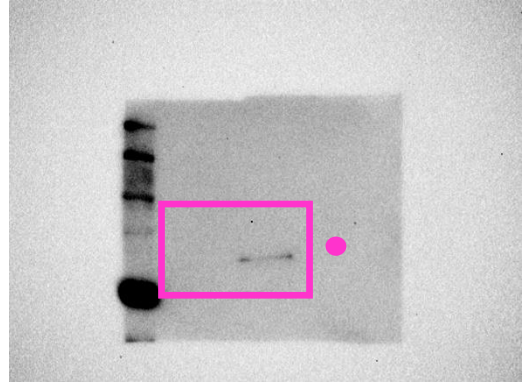

## Right panel

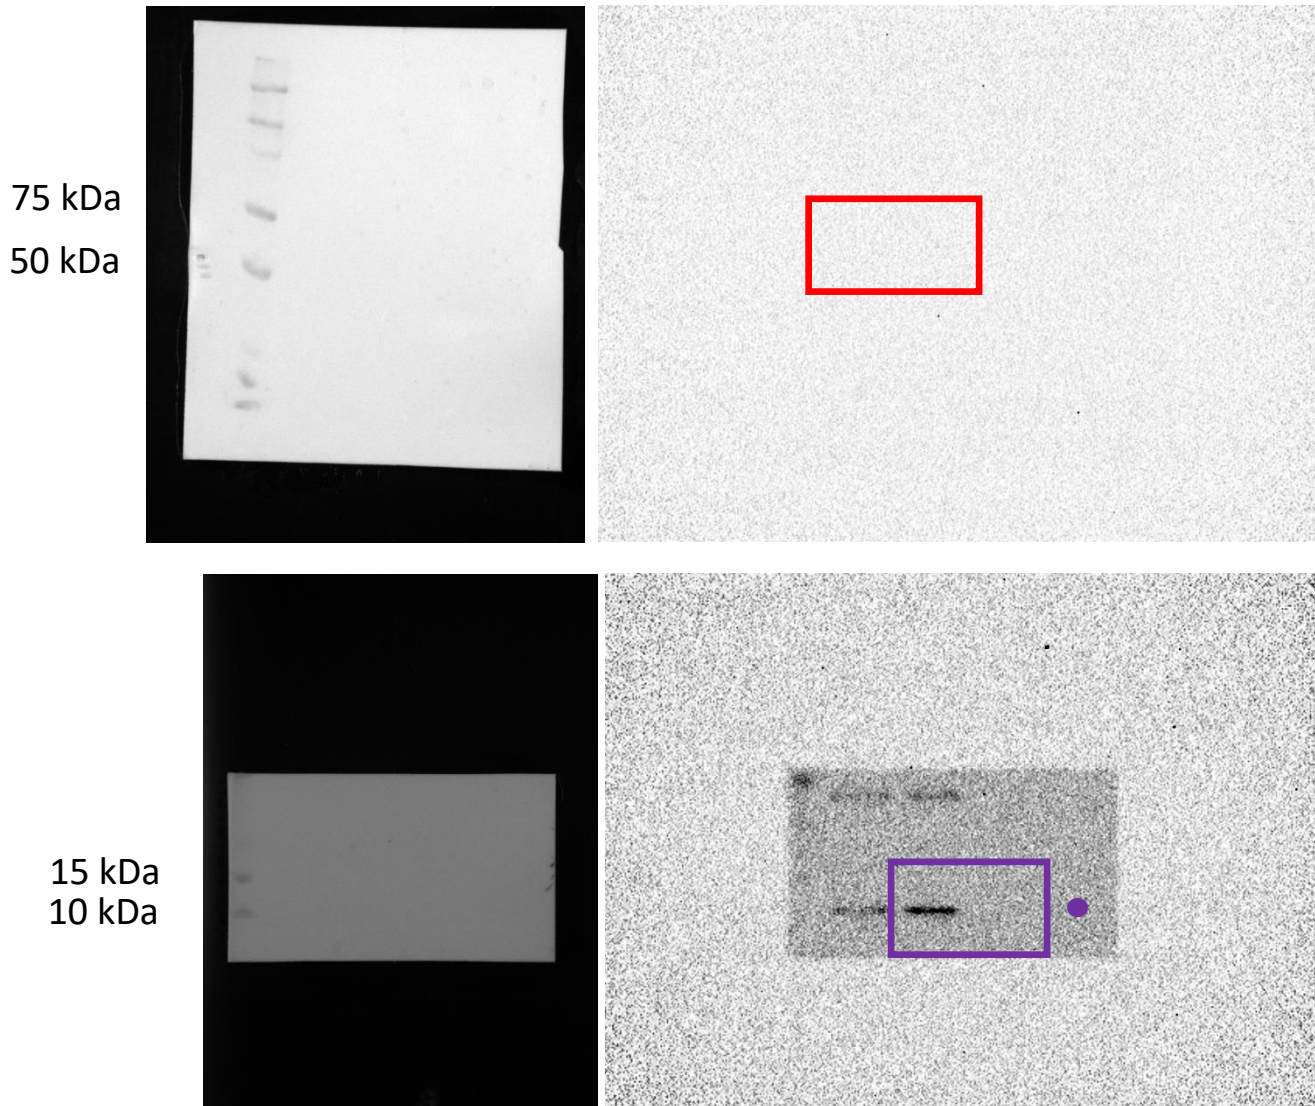

Boxed in red is the area of the blot used to detect GatA-V5 (not present) for lanes 1 and 2 of the right panel of Fig. 3e.

Boxed in purple is the area of the blot used to detect CcmE-His (purple circle) for lanes 1 and 2 of the right panel of Fig. 3e (this area of the blot was rotated 180 degrees on its X-axis before being used in Fig. 3e).
