# Supplementary material
Source: PubMed Central journal article supplement (PMC7611593)
Supplement: EMS131972-supplement-Supplementary_information.pdf [file EMS131972-supplement-Supplementary_information.pdf]

1 **Identification of Tse8 as a Type VI secretion system toxin from *Pseudomonas aeruginosa***  
2 **that targets the bacterial transamidosome to inhibit protein synthesis in prey cells**

3  
4 **Laura M. Nolan<sup>1\*</sup>, Amy K. Cain<sup>2&†</sup>, Thomas Clamens<sup>1†</sup>, R. Christopher D. Furniss<sup>1§</sup>,**  
5 **Eleni Manoli<sup>1</sup>, Maria A. Sainz-Polo<sup>3</sup>, Gordon Dougan<sup>2</sup>, David Albesa-Jové<sup>3,4‡</sup>, Julian**  
6 **Parkhill<sup>2^</sup>, Despoina A.I. Mavridou<sup>1,5#</sup> and Alain Filloux<sup>1#</sup>**

7  
8 <sup>1</sup>MRC Centre for Molecular Bacteriology and Infection (CMBI), Department of Life Sciences,  
9 Imperial College London, London, SW7 2AZ, United Kingdom.

10 <sup>2</sup>Wellcome Trust Sanger Institute, Wellcome Trust Genome Campus, Hinxton, Cambridge,  
11 CB10 1SA, United Kingdom.

12 <sup>3</sup>Structural Biology Unit, CIC bioGUNE, Bizkaia Technology Park, 48160 Derio, Spain.

13 <sup>4</sup>IKERBASQUE, Basque Foundation for Science, Bilbao, Spain.

14 <sup>5</sup>Department of Molecular Biosciences, University of Texas at Austin, Austin, 78712, Texas,  
15 USA

16

17 <sup>\*</sup>Current address: National Heart and Lung Institute, Imperial College London, London, SW3  
18 6LR, United Kingdom.

19 <sup>&</sup>Current address: Department of Molecular Sciences, Macquarie University, NSW 2109,  
20 Australia.

21 <sup>§</sup>Current address: Science for Life Laboratory, Department of Molecular Biosciences, The  
22 Wenner-Gren Institute, Stockholm University, Stockholm 10691, Sweden

23 <sup>^</sup>Current address: Department of Veterinary Medicine, University of Cambridge, Cambridge  
24 CB3 0ES, United Kingdom.

25 <sup>‡</sup>Current address: Instituto Biofisika (UPV/EHU, CSIC), Fundación Biofísica  
26 Bizkaia/Biofisika Bizkaia Fundazioa (FBB) and Departamento de Bioquímica y Biología

27 Molecular, University of the Basque Country, Leioa 48940, Spain.

28

29 †These authors have contributed equally to this work

30 #Correspondence to Alain Filloux: [a.filloux@imperial.ac.uk](mailto:a.filloux@imperial.ac.uk); Despoina Mavridou:

31 [despoina.mavridou@austin.utexas.edu](mailto:despoina.mavridou@austin.utexas.edu)

32 **Supplementary Tables**

33

34 **Legend for Supplementary Table 1**

35 **Supplementary Table 1.** Contains the full TraDIS data set (Tab 1), data above our threshold  
36 cut-off ( $-\log_{2}FC > 2$   $q < 0.05$ ) (Tab 2) and data from Tab 2 limited to genes  $< 600$  bp (Tab 3). See  
37 ‘Generation of TraDIS sequencing libraries, sequencing and downstream analysis’ in Methods  
38 for details on analyses. P values were corrected for multiple testing using the Benjamini-  
39 Hochberg method, and genes with a corrected P value (Q value) of  $< 0.05$  (5% false discovery  
40 rate) and an absolute  $\log_{2}$  fold change ( $\log_{2}FC$ ) of  $> 2$  were considered significant.

41

42 **Supplementary Table 2.** Strains and plasmids used in the current study.

| Stain or plasmid                                 | Relevant characteristics                                                                                                                                                                      | Reference/source          |
|--------------------------------------------------|-----------------------------------------------------------------------------------------------------------------------------------------------------------------------------------------------|---------------------------|
| <b>Strain</b>                                    |                                                                                                                                                                                               |                           |
| <i>Escherichia coli</i>                          |                                                                                                                                                                                               |                           |
| Dh5α                                             | F - <i>endA1 glnV44 thi-1 recA1 relA1 gyrA96 deoR nupG purB20 φ80dlacZ ΔM15 Δ(lacZYA-argF)</i> U169, <i>hsdR17</i> (r K-mK+), λ-                                                              | Invitrogen                |
| CC118λpir                                        | Host strain for pKNG101 replication; Δ( <i>ara leu</i> ) <i>araD ΔlacX 74 galE galK -phoA 20 thi-1 rpsE rpoB argE (Am) recA 1 Rfr</i> λpir                                                    | Laboratory collection     |
| SM10                                             | Host strain for pBT20 and replication; <i>thi-1 thr leu tonA lacY supE recA ::RP4-2-Tc::Mu</i> λpir , KmR                                                                                     | <sup>5</sup>              |
| BL21 (DE3)                                       | B F <sup>-</sup> <i>ompT gal dcm lon hsdSB(rB<sup>-</sup>mB<sup>-</sup>)</i> λ(DE3 [ <i>lacI lacUV5-T7p07 ind1 sam7 nin5</i> ]) [ <i>malB<sup>+</sup></i> ] <sub>K-12</sub> (λ <sup>S</sup> ) | Invitrogen                |
| B834                                             | F- <i>ompT hsdSB(rB- mB-)</i> <i>gal dcm met</i> (DE3)                                                                                                                                        | Invitrogen                |
| K12                                              | <i>supE44 hsdS20 recA13 ara-14 proA2 lacY1 galK2 rpsL20 xyl-5 mtl-1</i>                                                                                                                       | Laboratory collection     |
| DHM1                                             | <i>cya-854 recA1 gyrA96 (Nal) thi1 hsdR17 spoT1 rfbD1 glnV44(AS)</i>                                                                                                                          | <sup>6</sup>              |
| <i>Agrobacterium tumefaciens</i>                 |                                                                                                                                                                                               |                           |
| C58                                              | Wild type virulent strain containing nopaline-type Ti plasmid pTiC58                                                                                                                          | Eugene Nester             |
| <i>Pseudomonas aeruginosa</i>                    |                                                                                                                                                                                               |                           |
| PAK                                              | Wild type                                                                                                                                                                                     | Filloux laboratory strain |
| PAKΔ <i>retS</i>                                 | <i>retS</i> deletion mutant                                                                                                                                                                   | <sup>7</sup>              |
| PAKΔ <i>retS</i> Δ <i>vgrG1a</i>                 | <i>retS</i> and <i>vgrG1a</i> deletion mutant                                                                                                                                                 | <sup>7</sup>              |
| PAKΔ <i>retS</i> Δ <i>vgrG1c</i>                 | <i>retS</i> and <i>vgrG1c</i> deletion mutant                                                                                                                                                 | <sup>7</sup>              |
| PAKΔ <i>retS</i> Δ <i>vgrG1a</i> Δ <i>vgrG1c</i> | <i>retS</i> , <i>vgrG1a</i> and <i>vgrG1c</i> deletion mutant                                                                                                                                 | <sup>7</sup>              |

|                                                                    |                                                                                                                                                                                                                                                                              |                               |
|--------------------------------------------------------------------|------------------------------------------------------------------------------------------------------------------------------------------------------------------------------------------------------------------------------------------------------------------------------|-------------------------------|
| PAK $\Delta$ <i>retS<math>\Delta</math>H1</i>                      | <i>retS</i> and H1-T6SS cluster (encompassing the PAK genes corresponding to PA0070-PA0095) are deleted                                                                                                                                                                      | 7                             |
| PAK $\Delta$ <i>retS<math>\Delta</math>H1-H3</i>                   | <i>retS</i> , H1-T6SS cluster (encompassing the PAK genes corresponding to PA0070-PA0095), H2-T6SS cluster (encompassing the PAK genes corresponding to mid PA1657 to PA1662) and H3-T6SS cluster (encompassing the PAK genes corresponding to PA2357 to PA2377) are deleted | Filloux laboratory strain     |
| PAK $\Delta$ <i>retS<math>\Delta</math>H2<math>\Delta</math>H3</i> | <i>retS</i> , H2-T6SS cluster (encompassing the PAK genes corresponding to mid PA1657 to PA1662) and H3-T6SS cluster (encompassing the PAK genes corresponding to PA2357 to PA2377) are deleted                                                                              | This study                    |
| PAK $\Delta$ <i>retS<math>\Delta</math><i>tseI8</i></i>            | <i>retS</i> as well as PA4163 to PA4164 are deleted                                                                                                                                                                                                                          | This study                    |
| PAK $\Delta$ <i>retS<math>\Delta</math><i>tse8</i></i>             | <i>retS</i> as well as PA4163 ( <i>tse8</i> ) are deleted                                                                                                                                                                                                                    | This study                    |
| PAK $\Delta$ <i>retS<math>\Delta</math><i>tseI8::lacZ</i></i>      | <i>retS</i> as well PA4163 to PA4164 are deleted with the <i>lacZ</i> gene from miniCTX-lac inserted at the vacant <i>att</i> site on the chromosome                                                                                                                         | This study                    |
| PAK $\Delta$ <i>retS::tse8S186A</i>                                | <i>retS</i> deletion mutant with <i>tse8</i> (native locus) having S186A substitution                                                                                                                                                                                        | This study                    |
| PAK $\Delta$ <i>retS<math>\Delta</math>H1::<i>tse8S186A</i></i>    | <i>retS</i> and H1-T6SS deletion mutant with <i>tse8</i> (native locus) having S186A substitution                                                                                                                                                                            | This study                    |
| <b>Plasmid</b>                                                     |                                                                                                                                                                                                                                                                              |                               |
| pCR-BluntII-TOPO Blunt                                             | Cloning vector, Zeo <sup>R</sup> /Km <sup>R</sup>                                                                                                                                                                                                                            | Invitrogen                    |
| pKNG101                                                            | Suicide vector, <i>sacB</i> , Str <sup>R</sup>                                                                                                                                                                                                                               | 8                             |
| pKNG101: <i>tseI8</i> mutator                                      | Mutator construct for deletion of <i>tseI8</i> by allelic exchange                                                                                                                                                                                                           | This study                    |
| pKNG101: <i>tseS186A</i> mutator                                   | Mutator construct for generating <i>tse8S186A</i> at native site on chromosome by allelic exchange                                                                                                                                                                           | This study                    |
| pKNG101:H2-T6SS                                                    | Mutator construct for deletion of H2-T6SS by allelic exchange                                                                                                                                                                                                                | Filloux laboratory collection |

|                               |                                                                                                               |                               |
|-------------------------------|---------------------------------------------------------------------------------------------------------------|-------------------------------|
| pKNG101:H3-T6SS               | Mutator construct for deletion of H3-T6SS by allelic exchange                                                 | Filloux laboratory collection |
| pRK2013                       | Tra+, Mob+, Km <sup>R</sup>                                                                                   | 9                             |
| pUX-BF13                      | OriR6K helper plasmid, mob/oriT, provides Tn7 transposition function in trans, Amp <sup>R</sup>               | 10                            |
| pBT20                         | For mariner transposon mutagenesis, Gm <sup>R</sup> /Amp <sup>R</sup>                                         | 11                            |
| pET-41a-3CD                   | Vector derived from pET-41a by Novagen produces fusion protein with N-terminal GST-His-S tag, Km <sup>R</sup> | 12                            |
| pE221                         | Coding region of leaderless <i>E. coli</i> CcmE (S32-S163) with a C-terminal polyhistidine tag, pET22b, ApR   | 13                            |
| pET28a                        | Expression vector, Km <sup>R</sup>                                                                            | Novagen                       |
| pET28a: <i>tse8</i>           | Coding region of <i>tse8</i> in frame with N-terminal 6xHis)                                                  | This study                    |
| pET28a: <i>gatA</i> -V5       | Coding region of <i>gatA</i> with C-terminal V5 tag (out of frame with 6xHis)                                 | This study                    |
| pET41a: <i>gatA</i> -V5       | Coding region of <i>gatA</i> with C-terminal V5 tag (out of frame with 6xHis)                                 | This study                    |
| pET41a: <i>tse8</i> -HA       | Coding region of <i>tse8</i> with C-terminal HA tag (out of frame with 6xHis)                                 | This study                    |
| pET41a: <i>tse8</i> -HA-Strep | Coding region of <i>tse8</i> with C-terminal HA-Strep tag (out of frame with 6xHis)                           | This study                    |
| pET28a: <i>gatC</i> -HA       | Coding region of <i>gatC</i> with C-terminal HA tag (out of frame with 6xHis)                                 | This study                    |
| pET41a-3CD-TEV                | pET41a as above but with a TEV site introduced to allow cleavage of N-terminal tags                           | This study                    |
| pET41a-3CD-TEV: <i>tse8</i>   | pET41a with coding region of <i>tse8</i> in frame for (cleavable) N-terminal GST-His-S tag                    | This study                    |
| pACYCduet1                    | Dual expression vector, CmR                                                                                   | Novagen                       |

|                             |                                                                                                                 |                               |
|-----------------------------|-----------------------------------------------------------------------------------------------------------------|-------------------------------|
| pACYCduet1-His- <i>gatB</i> | Coding region of <i>gatB</i> with N-terminal His tag into MCS1                                                  | This study                    |
| pMMB67HE                    | Expression vector, Ap <sup>R</sup>                                                                              | Filloux laboratory collection |
| pMMB67: <i>tse8</i>         | Coding region of <i>tse8</i> with no tag                                                                        | This study                    |
| pMMB67: <i>tse8</i> -HA     | Coding region of <i>tse8</i> with C-terminal HA tag                                                             | This study                    |
| pMMB67: <i>vgrG1a</i> -V5   | Coding region of <i>vgrG1a</i> (PA0091) with C-terminal V5 tag                                                  | This study                    |
| pMMB67: <i>vgrG1b</i> -V5   | Coding region of <i>vgrG1b</i> (PA0095) with C-terminal V5 tag                                                  | This study                    |
| pMMB67: <i>vgrG1c</i> -V5   | Coding region of <i>vgrG1c</i> (PA2685) with C-terminal V5 tag                                                  | This study                    |
| pBBR1MCS5                   | Expression vector, Gm <sup>R</sup>                                                                              | 14                            |
| pBBR1: <i>tsei8</i>         | Coding region of <i>tsei8</i> with 500 bp upstream region to include native promoter                            | This study                    |
| pBBR1MCS4                   | Expression vector, Amp <sup>R</sup>                                                                             | 14                            |
| pBBR1: <i>tse8</i>          | Coding region of <i>tse8</i> (untagged) in constitutively expressed plasmid                                     | This study                    |
| miniCTX: <i>sfGfp</i>       | sfGfp under control of constitutive <i>pX2</i> promoter with integration at vacant Tn7 site on the chromosome   | Knut Drescher lab collection  |
| pJN105                      | Expression vector, Gm <sup>R</sup>                                                                              | 15                            |
| pJN: <i>tsi8</i> -V5        | Coding region of <i>tsi8</i> with C-terminal V5 tag                                                             | This study                    |
| pJN: <i>asnS</i> -His       | Coding region of <i>asnS</i> from <i>E. coli</i> with C-terminal His tag                                        | This study                    |
| pTrc200                     | Sm <sup>R</sup> , Sp <sup>R</sup> , pVS1 origin <i>lacI<sup>q</sup></i> , <i>trc</i> promoter expression vector | 16                            |
| pTrC: <i>tse8</i> -HA       | Coding region of <i>tse8</i> with C-terminal HA tag                                                             | This study                    |
| pUT18c                      | Vector for Bacterial Two-Hybrid assay                                                                           | 6                             |

|                         |                                                                                 |            |
|-------------------------|---------------------------------------------------------------------------------|------------|
| pKT25                   | Vector for Bacterial Two-Hybrid assay                                           | 6          |
| pUT18c-Zip              | N-terminal T18 fusion on leucine zipper of GCN4                                 | 6          |
| pKT25-Zip               | N-terminal T25 fusion on leucine zipper of GCN4                                 | 6          |
| pUT18c- <i>tse8</i>     | N-terminal T18 fusion to coding region of <i>tse8</i>                           | This study |
| pKT25- <i>tse8</i>      | N-terminal T25 fusion to coding region of <i>tse8</i>                           | This study |
| pUT18c- <i>tsi8</i> -V5 | N-terminal T18 fusion to coding region of <i>tsi8</i> with<br>C-terminal V5 tag | This study |
| pKT25- <i>tsi8</i> -V5  | N-terminal T25 fusion to coding region of <i>tsi8</i> with<br>C-terminal V5 tag | This study |
| pUT18c- <i>vgrG1a</i>   | N-terminal T18 fusion to coding region of <i>vgrG1a</i>                         | This study |
| pKT25c- <i>vgrG1a</i>   | N-terminal T25 fusion to coding region of <i>vgrG1a</i>                         | This study |
| pUT18c- <i>vgrG1b</i>   | N-terminal T18 fusion to coding region of <i>vgrG1b</i>                         | This study |
| pKT25c- <i>vgrG1b</i>   | N-terminal T25 fusion to coding region of <i>vgrG1b</i>                         | This study |
| pUT18c- <i>vgrG1c</i>   | N-terminal T18 fusion to coding region of <i>vgrG1c</i>                         | This study |
| pKT25c- <i>vgrG1c</i>   | N-terminal T25 fusion to coding region of <i>vgrG1c</i>                         | This study |



44 **Supplementary Table 3.** Primers used in the current study.

| <b>Primer list</b> | <b>Name</b>                      | <b>Oligonucleotide sequence (5'-3')</b> | <b>Description</b>                                |
|--------------------|----------------------------------|-----------------------------------------|---------------------------------------------------|
| OAL2939            | Primer 1 <i>tsei8</i> left F     | GGCATCCACGGC<br>GCTTTCCG                | Generate deletion mutant of <i>tsei8</i> primer 1 |
| OAL2940            | Primer 2 <i>tsei8</i> left R     | TCAGTCGCGCTC<br>GATCATGCTGTC<br>ACC     | Generate deletion mutant of <i>tsei8</i> primer 2 |
| OAL2941            | Primer 3 <i>tsei8</i> right F    | ATGATCGAGCGC<br>GACTGAGCGCTT            | Generate deletion mutant of <i>tsei8</i> primer 3 |
| OAL2942            | Primer 4 <i>tsei8</i> right R    | GCTCTACATCGG<br>CACGTTACCC              | Generate deletion mutant of <i>tsei8</i> primer 4 |
| OAL2943            | Primer 5 upstream <i>tsei8</i>   | GCGTTGACCGTG<br>ATGCCAG                 | Generate deletion mutant of <i>tsei8</i> primer 5 |
| OAL2944            | Primer 6 downstream <i>tsei8</i> | GAGGACCCGGCC<br>TACTACGG                | Generate deletion mutant of <i>tsei8</i> primer 6 |
| OAL2939            | Primer 1 <i>tse8</i> left F      | GGCATCCACGGC<br>GCTTTCCG                | Generate deletion mutant of <i>tse8</i> primer 1  |
| OAL4770            | Primer 2 <i>tse8</i> left R      | TCACTTGCTCTC<br>GATCATGCTGTC<br>ACC     | Generate deletion mutant of <i>tse8</i> primer 2  |
| OAL4771            | Primer 3 <i>tse8</i> right F     | ATGATCGAGAGC<br>AAGTGAAAGGC<br>GCGG     | Generate deletion mutant of <i>tse8</i> primer 3  |
| OAL4772            | Primer 4 <i>tse8</i> right R     | GCTTCGCCGCCT<br>ACACCACGG               | Generate deletion mutant of <i>tse8</i> primer 4  |
| OAL2943            | Primer 5 upstream <i>tse8</i>    | GCGTTGACCGTG<br>ATGCCAG                 | Generate deletion mutant of <i>tse8</i> primer 5  |

|         |                                    |                                     |                                                  |
|---------|------------------------------------|-------------------------------------|--------------------------------------------------|
| OAL4773 | Primer 6 downstream<br><i>tse8</i> | GCGAGCGCCTGG<br>GATTCC              | Generate deletion mutant of <i>tse8</i> primer 6 |
| OAL996  | Primer 1 H2-T6SS left F            | GACTGGTTGAAA<br>ATCCTGGAAAAC        | Generate deletion mutant in H2-T6SS<br>primer 1  |
| OAL997  | Primer 2 H2-T6SS left F            | TCAGGCGAACGG<br>CCTCCTGCTGGG<br>CGC | Generate deletion mutant in H2-T6SS<br>primer 2  |
| OAL998  | Primer 3 H2-T6SS left F            | AGGAGGCCGTTC<br>GCCTGAGGTGGG<br>TGC | Generate deletion mutant in H2-T6SS<br>primer 3  |
| OAL999  | Primer 4 H2-T6SS left F            | CAACACGGTATA<br>GGGGTTGTG           | Generate deletion mutant in H2-T6SS<br>primer 4  |
| OAL1000 | Primer 5 H2-T6SS left F            | GAATTGTTAAGA<br>TATTCATTGGCG<br>CAC | Generate deletion mutant in H2-T6SS<br>primer 5  |
| OAL1001 | Primer 6 H2-T6SS left F            | TCGAGCAGCAGG<br>GTTCCGCCATCC<br>GCG | Generate deletion mutant in H2-T6SS<br>primer 6  |
| OAL1002 | Primer 1 H3-T6SS left F            | ATTTCCGACATA<br>TGGTGAAACATC        | Generate deletion mutant in H3-T6SS<br>primer 1  |
| OAL1003 | Primer 2 H3-T6SS left F            | TGCTGATCAGAA<br>GCGCAGCTCGAC<br>GTT | Generate deletion mutant in H3-T6SS<br>primer 2  |
| OAL1004 | Primer 3 H3-T6SS left F            | CTGCGCTTCTGA<br>TCAGCATCAACC<br>TCT | Generate deletion mutant in H3-T6SS<br>primer 3  |

|         |                         |                                                                                                    |                                                                                                                         |
|---------|-------------------------|----------------------------------------------------------------------------------------------------|-------------------------------------------------------------------------------------------------------------------------|
| OAL1005 | Primer 4 H3-T6SS left F | GTGAATGGCACG<br>AATAAATAGTTC<br>ATA                                                                | Generate deletion mutant in H3-T6SS primer 4                                                                            |
| OAL1006 | Primer 5 H3-T6SS left F | AACTGCTGCCGG<br>TAGTCGCGGCGG<br>TAC                                                                | Generate deletion mutant in H3-T6SS primer 5                                                                            |
| OAL1007 | Primer 6 H3-T6SS left F | CACCCTTTCAG<br>TAGTCGCACATC<br>AGC                                                                 | Generate deletion mutant in H3-T6SS primer 6                                                                            |
| OAL3095 | <i>tsei8</i> comp_F     | GGATCCCAGCGT<br>CTCGGCGGTTTG                                                                       | Generate complementation construct of <i>tsei8</i> with native promoter (500 bp upstream of <i>tsei8</i> ) (BamHI site) |
| OAL3096 | <i>tsei8</i> comp_R     | AAGCTTTCAGTC<br>GCGCAGGGCGTA                                                                       | Generate complementation construct of <i>tsei8</i> (HindIII site)                                                       |
| OAL3099 | <i>tse8</i> comp_F      | CCGGCGGATCCT<br>AACAGGAGGAA<br>TTAACCATGATC<br>GAGGTCACCGAG<br>GTT                                 | Generate complementation of <i>tse8</i> with C-terminal V5 tag (BamHI site)                                             |
| OAL3100 | <i>tse8</i> comp_R      | CCGGGCTCGAGT<br>CACGTAGAATCG<br>AGACCGAGGAG<br>AGGGTTAGGGAT<br>AGGCTTACCCTT<br>GCTTGCCAGCGG<br>TGG | Generate complementation of <i>tse8</i> with C-terminal V5 tag (XhoI site)                                              |
| OAL3792 | <i>tse8</i> _BTH_F      | GAGCTCTCACTT<br>GCTTGCCAGCGG                                                                       | Generate <i>tse8</i> with N-terminal T18/T25 fusion in BTH vector (BamHI site)                                          |

|         |                      |                                                                                           |                                                                                                          |
|---------|----------------------|-------------------------------------------------------------------------------------------|----------------------------------------------------------------------------------------------------------|
| OAL3792 | <i>tse8</i> _BTH_R   | GAGCTCTCACTT<br>GCTTGCCAGCGG                                                              | Generate <i>tse8</i> with N-terminal T18/T25 fusion in BTH vector (SacI site)                            |
| OAL4774 | <i>tse8</i> no tag_F | TCTAGAATGATC<br>GAGGTCACCGAG<br>GTT                                                       | Generate <i>tse8</i> with no tag (XbaI site)                                                             |
| OAL4775 | <i>tse8</i> no tag_R | GAGCTCTCACTT<br>GCTTGCCAGCGG<br>T                                                         | Generate <i>tse8</i> with no tag (SacI site)                                                             |
| OAL3560 | <i>tsi8</i> BTH_F    | GCGCTCTAGAAT<br>GCAGCGACTCTT<br>CGTCTACGGCAG<br>C                                         | Generate <i>tse8</i> with N-terminal T18/T25 fusion and C-terminal V5 tag in BTH vector (XbaI site)      |
| OAL3561 | <i>tsi8</i> BTH_R    | GGATCCTCACGT<br>AGAATCGAGACC<br>GAGGAGAGGGT<br>TAGGGATAGGCT<br>TACCGTCGCGCA<br>GGGCGTAGAC | Generate <i>tse8</i> with N-terminal T18/T25 fusion and C-terminal V5 tag in BTH vector (BamHI site)     |
| OAL4061 | His- <i>tsi8</i> _F  | GGATCCATGCAG<br>CGACTCTTCGTC<br>TA                                                        | Generate <i>tsi8</i> with N-terminal His tag in pET28a (BamHI site)                                      |
| OAL4062 | His- <i>tsi8</i> _R  | GAGCTCTCAGTC<br>GCGCAGGGCGT                                                               | Generate <i>tsi8</i> with N-terminal His tag in pET28a (SacI site)                                       |
| OAL1511 | Tn7- <i>glmS</i>     | AATCTGGCCAAG<br>TCGGTGAC                                                                  | Combined with Tn7-RR109 produces a fragment of approx. 150bp that can be used to check any Tn7 insertion |

|         |                  |                                                                       |                                                                                                         |
|---------|------------------|-----------------------------------------------------------------------|---------------------------------------------------------------------------------------------------------|
| OAL1512 | Tn7-RR109        | CAGCATAACTGG<br>ACTGATTTTCAG                                          | Combined with Tn7-glmS produces a fragment of approx. 150bp that can be used to check any Tn7 insertion |
| OAL3231 | <i>vgrGla</i> _F | ATGCAACTGACC<br>CGCCTGGTCCAG<br>GTGGA                                 | Generation of <i>vgrGla</i> (PA0091) with C-terminal V5 tag                                             |
| OAL3232 | <i>vgrGla</i> _R | TCAGCACGCGTA<br>GTCCGGCACGTC<br>GTACGGGTAGCC<br>CTTCGCCGGCGG<br>CGGAA | Generation of <i>vgrGla</i> (PA0091) with C-terminal V5 tag                                             |
| OAL3233 | <i>vgrGlb</i> _F | ATGGCACTTGCG<br>CAACAGACCCGC<br>CTGGT                                 | Generation of <i>vgrGlb</i> (PA0095) with C-terminal V5 tag                                             |
| OAL3234 | <i>vgrGlb</i> _R | TCAGCACGCGTA<br>GTCCGGCACGTC<br>GTACGGGTAGTT<br>CTGGAGGATCTT<br>GCGT  | Generation of <i>vgrGlb</i> (PA0095) with C-terminal V5 tag                                             |
| OAL3235 | <i>vgrGlc</i> _F | GTGGCTATTGGC<br>CAGCCTTTCGCG<br>ACGGC                                 | Generation of <i>vgrGlc</i> (PA2685) with C-terminal V5 tag                                             |
| OAL3236 | <i>vgrGlc</i> _R | TCAGCACGCGTA<br>GTCCGGCACGTC<br>GTACGGGTAACA<br>GTTGATATCGAC<br>ATTGG | Generation of <i>vgrGlc</i> (PA2685) with C-terminal V5 tag                                             |

|         |                     |                                              |                                                                                  |
|---------|---------------------|----------------------------------------------|----------------------------------------------------------------------------------|
| OAL1740 | <i>vgrG1a</i> BTH_F | GCGCGGGATCCC<br>ATGCAACTGACC<br>CGCCTG       | Generate <i>vgrG1a</i> with N-terminal T18/T25 fusion in BTH vector (BamHI site) |
| OAL1741 | <i>vgrG1a</i> BTH_R | GCGCGGAATTCT<br>CAGCCCTTCGCC<br>GGCGG        | Generate <i>vgrG1a</i> with N-terminal T18/T25 fusion in BTH vector (EcoRI site) |
| OAL1860 | <i>vgrG1b</i> BTH_F | GCGCGTCTAGAG<br>ATGGCACTTGCG<br>CAACAGACC    | Generate <i>vgrG1b</i> with N-terminal T18/T25 fusion in BTH vector (XbaI site)  |
| OAL1861 | <i>vgrG1b</i> BTH_R | GCGCGGAATTCT<br>CAGTTCTGGAGG<br>ATCTTGCG     | Generate <i>vgrG1b</i> with N-terminal T18/T25 fusion in BTH vector (EcoRI site) |
| OAL2390 | <i>vgrG1c</i> BTH_F | GCGCGTCTAGAA<br>TGCAACACACCC<br>GCCTGGTACACG | Generate <i>vgrG1c</i> with N-terminal T18/T25 fusion in BTH vector (XbaI site)  |
| OAL2391 | <i>vgrG1c</i> BTH_R | GCGCGGAATTCT<br>CAACAGTTGATA<br>TCGACATTGGGC | Generate <i>vgrG1c</i> with N-terminal T18/T25 fusion in BTH vector (EcoRI site) |
| OAL2458 | <i>vgrG6</i> BTH_F  | GCGCGTCTAGAA<br>TGTCGCCCCCG<br>CCAACCAGACGC  | Generate <i>vgrG6</i> with N-terminal T18/T25 fusion in BTH vector (XbaI site)   |
| OAL2459 | <i>vgrG6</i> BTH_R  | GCGCGGAATTCT<br>CATGGCGTGGGC<br>TCATCCTTGTCG | Generate <i>vgrG6</i> with N-terminal T18/T25 fusion in BTH vector (EcoRI site)  |
| OAL3099 | <i>tse8</i> -HA_F   | CCGGCGGATCCT<br>AACAGGAGGAA<br>TTAACCATGATC  | Generate <i>tse8</i> -HA (BamHI site and Shine-Dalgarno)                         |

|         |                         |                                                                                      |                                                                                                                                                                 |
|---------|-------------------------|--------------------------------------------------------------------------------------|-----------------------------------------------------------------------------------------------------------------------------------------------------------------|
|         |                         | GAGGTCACCGAG<br>GTT                                                                  |                                                                                                                                                                 |
| OAL3310 | <i>tse8</i> -HA_R       | GCCGGCTGCAGT<br>CAGCACGCGTAG<br>TCCGGCACGTCG<br>TACGGGTACTTG<br>CTTGCCAGCGGT<br>GGAG | Generate <i>tse8</i> -HA (PstI site)                                                                                                                            |
| OAL3669 | <i>tse8</i> exp_F       | GCGCGGATCCAT<br>CGAGGTCACCGA<br>GGTTTC                                               | Generate <i>tse8</i> with N-terminal GST-His-S tag for purification (BamHI site)                                                                                |
| OAL3670 | <i>tse8</i> exp_R       | GCGGCCGCTCAC<br>TTGCTTGCCAGC<br>GG                                                   | Generate <i>tse8</i> with N-terminal GST-His-S tag for purification (NotI site)                                                                                 |
| OAL5140 | <i>tse8</i> -HA-Strep_F | CATATGATCGAG<br>GTCACCGAGGTT<br>TCCATCGCCGAG<br>CTGCGTG                              | Generate <i>tse8</i> with C-terminal HA and Strep tags (NdeI site) with pET41a: <i>tse8</i> -HA as template; use with primer <i>gatC</i> -HA-Strep <sup>R</sup> |
| OAL3301 | <i>tsi8</i> -V5_F       | CCGCCTCTAGAT<br>AACAGGAGGAA<br>TTAACCATGCAG<br>CGACTCTTCGTC<br>TAC                   | Generate <i>tsi8</i> with C-terminal V5 tag (XbaI site and Shine-Dalgarno)                                                                                      |
| OAL3302 | <i>tsi8</i> -V5_F       | CTGCAGTCACGT<br>AGAATCGAGACC<br>GAGGAGAGGGT<br>TAGGGATAGGCT<br>TACCCGTAGAAT          | Generate <i>tsi8</i> with C-terminal V5 tag (PstI site)                                                                                                         |

|         |                   |                                                                                                    |                                                                            |
|---------|-------------------|----------------------------------------------------------------------------------------------------|----------------------------------------------------------------------------|
|         |                   | CGAGACCGAGG<br>AGAGGGTTAGG<br>GATAGGCTTACC<br>GTCGCGCAGGGC<br>GTAGA                                |                                                                            |
| OAL3273 | <i>gatA</i> -V5_F | CCGGCCTCGAGT<br>AACAGGAGGAA<br>TTAACCATGCTG<br>CATCAATTGACC<br>CT                                  | Generate <i>gatA</i> with C-terminal V5 tag (XhoI site and Shine-Dalgarno) |
| OAL3274 | <i>gatA</i> -V5_R | CCGGGATGCATT<br>TACGTAGAATCG<br>AGACCGAGGAG<br>AGGGTTAGGGAT<br>AGGCTTACCGAA<br>GCCGGCCGGGGT<br>GCG | Generate <i>gatA</i> with C-terminal V5 tag (NsiI site)                    |
| OAL3275 | <i>gatB</i> _F    | GCGCGGGATCCG<br>CAATGGGAAACC<br>GTGATC                                                             | Generate <i>gatB</i> with N-terminal His tag (BamHI site)                  |
| OAL3276 | <i>gatB</i> _R    | AAGCTTTCACGC<br>TTCGAGCTTTTT                                                                       | Generate <i>gatB</i> with N-terminal His tag (HindIII site)                |
| OAL3277 | <i>gatC</i> -HA_F | CATATGGCGCTT<br>GAACGCTCCGAC                                                                       | Generate <i>gatA</i> with C-terminal HA tag (NdeI site)                    |
| OAL3278 | <i>gatC</i> -HA_R | AATTACTCGAGT<br>CAGCACGCGTAG<br>TCCGGCACGTCG                                                       | Generate <i>gatA</i> with C-terminal HA tag (XhoI site)                    |



|         |                    |                                                                      |                                                                                                                                   |
|---------|--------------------|----------------------------------------------------------------------|-----------------------------------------------------------------------------------------------------------------------------------|
|         |                    | TACGGGTATGAC<br>TCGATGACTTTC<br>GG                                   |                                                                                                                                   |
| OAL3913 | <i>asnS</i> -His_F | GCGCGCTGCAGT<br>AACAGGAGGAA<br>TTAACCATGAGC<br>GTTGTGCCTGTA<br>GCCGA | Generate <i>asnS</i> (asparagine tRNA synthase from <i>E. coli</i> MG1655) with C-terminal His tag (SpeI site and Shine-Dalgarno) |
| OAL3914 | <i>asnS</i> -His_R | GGCGCACTAGTT<br>TAGTGATGGTGA<br>TGGTGATGGAAG<br>CTGGCGTTACGC<br>GG   | Generate <i>asnS</i> (asparagine tRNA synthase from <i>E. coli</i> MG1655) with C-terminal His tag (NotI site)                    |

46 **Supplementary Table 4.** Output of bioinformatic analyses of relevant bacteria possessing  
 47 GatCAB, AsnS and GlnS.

| <b>Transamidosome (GatCAB Components)</b>        |                                  |                                  |
|--------------------------------------------------|----------------------------------|----------------------------------|
| <b>GatA (pBLAST)</b>                             | <b>GatB (pBLAST)</b>             | <b>GatC (pBLAST)</b>             |
| <i>Agrobacterium tumefaciens</i>                 | <i>Agrobacterium tumefaciens</i> | <i>Agrobacterium tumefaciens</i> |
| <i>Pseudomonas aeruginosa</i>                    | <i>Pseudomonas aeruginosa</i>    | <i>Pseudomonas aeruginosa</i>    |
| <b>Operons containing gatCAB (nBLAST)</b>        |                                  |                                  |
| <i>Agrobacterium tumefaciens</i>                 |                                  |                                  |
| <i>Pseudomonas aeruginosa</i>                    |                                  |                                  |
| <b>Cognate tRNA synthases (AsnS and/or GlnS)</b> |                                  |                                  |
| <b>AsnS (pBLAST)</b>                             | <b>GlnS (pBLAST)</b>             |                                  |
| <i>Escherichia coli</i>                          | <i>Escherichia coli</i>          |                                  |
|                                                  | <i>Pseudomonas aeruginosa</i>    |                                  |

48

## 49 Supplementary References

- 50 1 Barquist, L., Boinett, C. J. & Cain, A. K. Approaches to querying bacterial genomes  
51 with transposon-insertion sequencing. *RNA biology* **10**, 1161-1169, doi:10.4161/rna.24765  
52 (2013).
- 53 2 Edgar, R. C. MUSCLE: multiple sequence alignment with high accuracy and high  
54 throughput. *Nucleic acids research* **32**, 1792-1797 (2004).
- 55 3 Robert, X. & Gouet, P. Deciphering key features in protein structures with the new  
56 ENDscript server. *Nucleic acids research* **42**, W320-324 (2014).
- 57 4 Wu, B. *et al.* Versatile peptide C-terminal functionalization via a computationally  
58 engineered peptide amidase. *ACS Catalysis* **6**, 5405-5414 (2016).
- 59 5 de Lorenzo, V. & Timmis, K. N. Analysis and construction of stable phenotypes in  
60 Gram-negative bacteria with Tn5- and Tn10-derived minitransposons. *Methods in enzymology*  
61 **235**, 386-405, doi:10.1016/0076-6879(94)35157-0 (1994).
- 62 6 Karimova, G., Pidoux, J., Ullmann, A. & Ladant, D. A bacterial two-hybrid system  
63 based on a reconstituted signal transduction pathway. *Proceedings of the National Academy of*  
64 *Sciences of the United States of America* **95**, 5752-5756 (1998).
- 65 7 Hachani, A. *et al.* Type VI secretion system in *Pseudomonas aeruginosa*: secretion and  
66 multimerization of VgrG proteins. *The Journal of biological chemistry* **286**, 12317-12327  
67 (2011).
- 68 8 Kaniga, K., Delor, I. & Cornelis, G. R. A wide-host-range suicide vector for improving  
69 reverse genetics in gram-negative bacteria: inactivation of the *blaA* gene of *Yersinia*  
70 *enterocolitica*. *Gene* **109**, 137-141 (1991).
- 71 9 Figurski, D. H. & Helinski, D. R. Replication of an origin-containing derivative of  
72 plasmid RK2 dependent on a plasmid function provided *in trans*. *Proceedings of the National*  
73 *Academy of Sciences of the United States of America* **76**, 1648-1652 (1979).
- 74 10 Bao, Y., Lies, D. P., Fu, H. & Roberts, G. P. An improved Tn7-based system for the  
75 single-copy insertion of cloned genes into chromosomes of Gram-negative bacteria. *Gene* **109**,  
76 167-168, doi:10.1016/0378-1119(91)90604-a (1991).
- 77 11 Kulasekara, H. D. *et al.* A novel two-component system controls the expression of  
78 *Pseudomonas aeruginosa* fimbrial cup genes. *Molecular microbiology* **55**, 368-380 (2005).
- 79 12 McCarthy, R. R. *et al.* Cyclic-di-GMP regulates lipopolysaccharide modification and  
80 contributes to *Pseudomonas aeruginosa* immune evasion. *Nat Microbiol* **2**, 17027 (2017).
- 81 13 Daltrop, O., Stevens, J. M., Higham, C. W. & Ferguson, S. J. The CcmE protein of the  
82 *c*-type cytochrome biogenesis system: unusual *in vitro* heme incorporation into apo-CcmE and  
83 transfer from holo-CcmE to apocytochrome. *Proceedings of the National Academy of Sciences*  
84 *of the United States of America* **99**, 9703-9708, doi:10.1073/pnas.152120699 (2002).
- 85 14 Kovach, M. E. *et al.* Four new derivatives of the broad-host-range cloning vector  
86 pBBR1MCS, carrying different antibiotic-resistance cassettes. *Gene* **166**, 175-176 (1995).
- 87 15 Newman, J. R. & Fuqua, C. Broad-host-range expression vectors that carry the L-  
88 arabinose-inducible *Escherichia coli* *araBAD* promoter and the *araC* regulator. *Gene* **227**, 197-  
89 203 (1999).

90 16 Schmidt-Eisenlohr, H., Domke, N. & Baron, C. TraC of IncN plasmid pKM101  
91 associates with membranes and extracellular high-molecular-weight structures in *Escherichia*  
92 *coli*. *Journal of bacteriology* **181**, 5563-5571 (1999).
